# Supplementary material
Source: PubMed Central journal article supplement (PMC4285776)

Supplementary Figure 1. iTRAQ report tags show the increased glycoprotein expression in aggressive (AG) prostate tumor compared to non-aggressive (NAG) prostate tumor. AG-prostate cancer tissues were labeled with iTRAQ Tag 113, 114, 115 and 121 and NAG-prostate cancer tissues were labeled with iTRAQ Tag 116, 117, 118 and 119.

2A. microfibrillar-associated protein 4 (peptide: vDLEDFEnNTAYAk);

2B. microfibrillar-associated protein 4 (peptide: fnGSVSFFR)

2C. periostin

2D. cathepsin L

2A

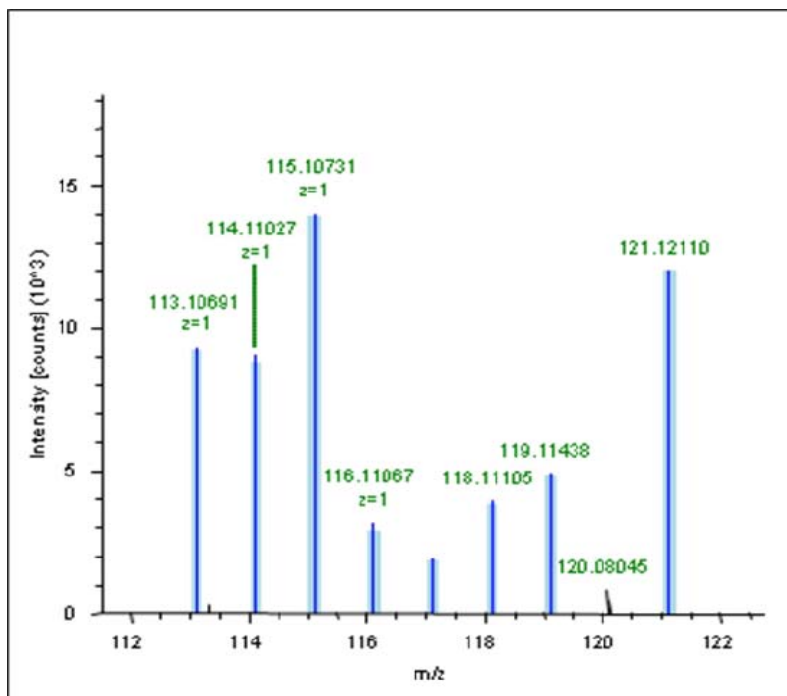

2B

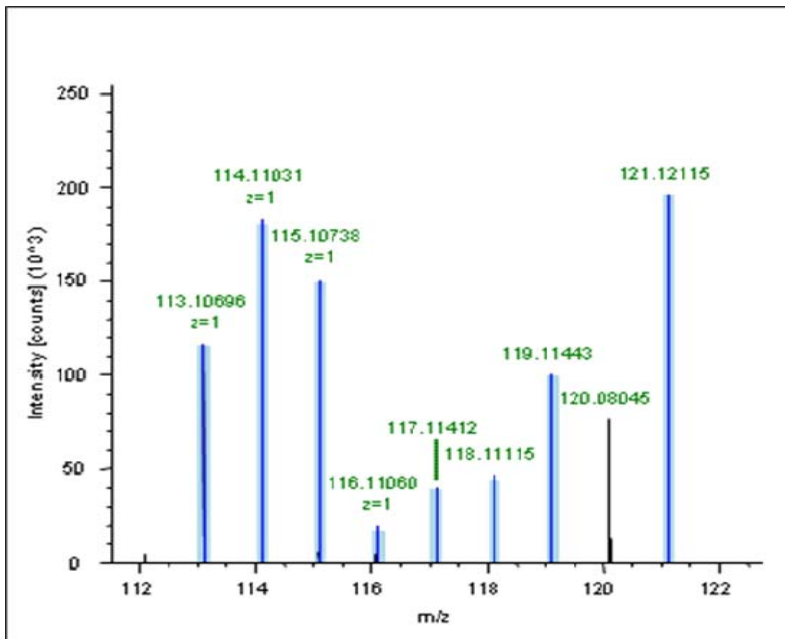

2C

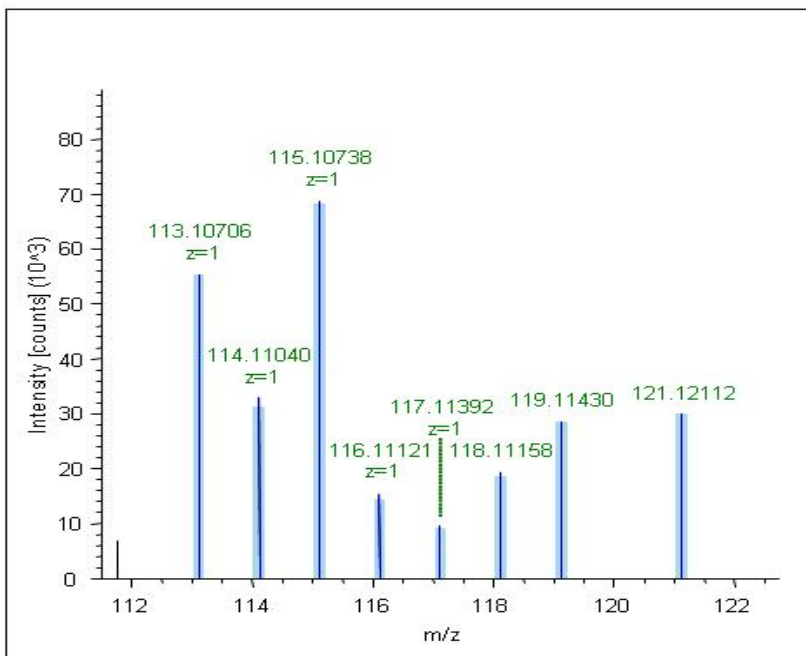

2D

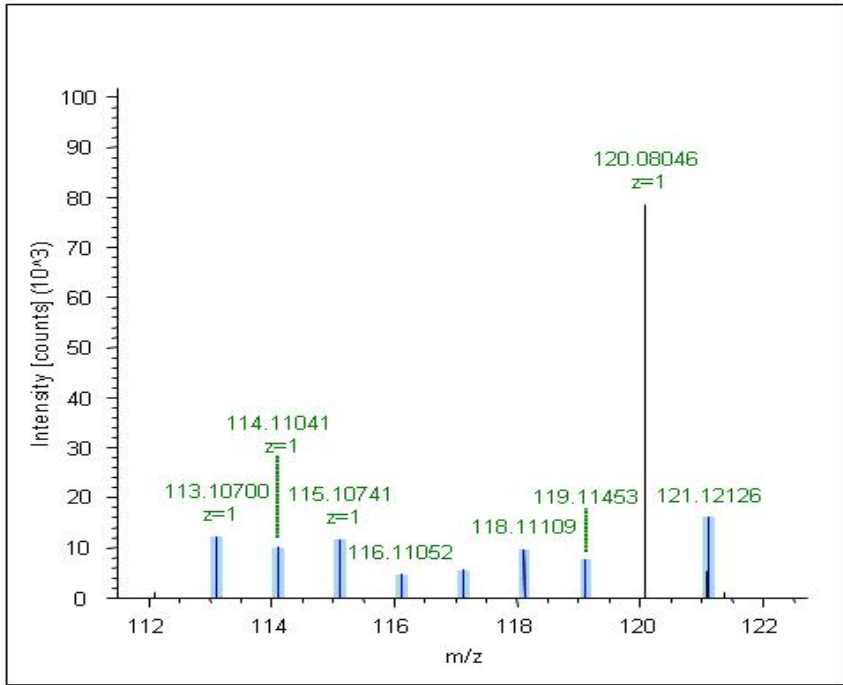

Supplement: NIHMS319263-supplement-2_si_002.pdf [file NIHMS319263-supplement-2_si_002.pdf]
